# Supplementary material
Source: HighWire-hosted journal article supplement (http://www.ajevonline.org/highwire/filestream/1906/field_highwire_adjunct_files/0/2_12-092_642p180_SuppData.pdf)
Supplement: 2_12-092_642p180_SuppData.pdf [file 2_12-092_642p180_SuppData.pdf]

**Supplemental Data for:**

Reynolds, A.G., G. Taylor, and C. de Savigny. 2013.

Defining Niagara terroir by chemical and sensory analysis of Chardonnay wines from various soil textures and vine sizes.

Am. J. Enol. Vitic. 64:180-194. doi: 10.5344/ajev.2013.12092.

**Supplemental Table 1** Levels of correlation and significance for aroma and flavor intensities of Chardonnay wines produced from grapes grown on two soil textures and two vine sizes in the Niagara Peninsula, 2000. Positive values indicate a positive correlation with the corresponding factor. Negative values indicate a negative correlation. \*, \*\*, \*\*\*, and ns indicate means significantly different at  $p < 0.05$ , 0.01, 0.001, and not significant, respectively.

| Factor                         | apple | citrus     | melon | floral     | vegetal    | earthy | Apple | Citrus | Melon      | Floral      | Vegetal     | Earthy      | Acidity   | Astringency/<br>bitterness | Body/<br>mouthfeel | Intensity/<br>length of<br>finish |
|--------------------------------|-------|------------|-------|------------|------------|--------|-------|--------|------------|-------------|-------------|-------------|-----------|----------------------------|--------------------|-----------------------------------|
| apple                          | 1.00  | 0.69<br>** | 0.12  | -0.14      | 0.39       | -0.18  | 0.31  | 0.30   | -0.04      | -0.19       | 0.38        | 0.01        | -0.19     | -0.05                      | -0.20              | 0.00                              |
| citrus                         |       | 1.00       | 0.02  | -0.28      | 0.60<br>** | -0.19  | 0.19  | 0.30   | -0.12      | -0.28       | 0.25        | -0.08       | 0.14      | -0.25                      | -0.35              | 0.18                              |
| melon                          |       |            | 1.00  | 0.54<br>** | -0.18      | -0.14  | 0.10  | 0.14   | 0.44<br>*  | 0.25        | 0.01        | 0.19        | 0.46<br>* | 0.00                       | 0.02               | 0.32                              |
| floral                         |       |            |       | 1.00       | -0.40      | -0.14  | -0.27 | -0.13  | 0.61<br>** | 0.65<br>**  | -0.34       | 0.03        | 0.33      | 0.10                       | 0.16               | 0.25                              |
| vegetal                        |       |            |       |            | 1.00       | 0.39   | -0.03 | 0.39   | -0.42<br>* | -0.52<br>** | 0.58<br>**  | 0.27        | -0.01     | 0.06                       | 0.21               | 0.23                              |
| earthy                         |       |            |       |            |            | 1.00   | -0.21 | 0.14   | -0.17      | -0.28       | 0.52<br>**  | 0.71<br>*** | -0.07     | 0.55<br>**                 | 0.79<br>***        | 0.21                              |
| Apple                          |       |            |       |            |            |        | 1.00  | 0.03   | 0.10       | 0.00        | 0.14        | -0.19       | -0.40     | 0.14                       | -0.34              | -0.31                             |
| Citrus                         |       |            |       |            |            |        |       | 1.00   | -0.04      | -0.41<br>*  | 0.45<br>*   | 0.03        | 0.25      | 0.22                       | 0.15               | 0.21                              |
| Melon                          |       |            |       |            |            |        |       |        | 1.00       | 0.71<br>*** | -0.28       | -0.05       | 0.30      | 0.13                       | -0.08              | 0.24                              |
| Floral                         |       |            |       |            |            |        |       |        |            | 1.00        | -0.63<br>** | -0.04       | 0.33      | -0.19                      | -0.06              | 0.21                              |
| Vegetal                        |       |            |       |            |            |        |       |        |            |             | 1.00        | 0.45<br>*   | -0.39     | 0.59<br>**                 | 0.28               | -0.15                             |
| Earthy                         |       |            |       |            |            |        |       |        |            |             |             | 1.00        | 0.02      | 0.52<br>**                 | 0.72<br>***        | 0.36                              |
| Acidity                        |       |            |       |            |            |        |       |        |            |             |             |             | 1.00      | -0.46<br>*                 | 0.05               | 0.61<br>**                        |
| Astringency/<br>bitterness     |       |            |       |            |            |        |       |        |            |             |             |             |           | 1.00                       | 0.53<br>**         | -0.11                             |
| Body/mouthfeel                 |       |            |       |            |            |        |       |        |            |             |             |             |           |                            | 1.00               | 0.30                              |
| Intensity/<br>length of finish |       |            |       |            |            |        |       |        |            |             |             |             |           |                            |                    | 1.00                              |

**Supplemental Data for:**

Reynolds, A.G., G. Taylor, and C. de Savigny. 2013.

Defining Niagara terroir by chemical and sensory analysis of Chardonnay wines from various soil textures and vine sizes.

Am. J. Enol. Vitic. 64:180-194. doi: 10.5344/ajev.2013.12092.

**Supplemental Table 2** Levels of correlation and significance for aroma and flavor intensities of Chardonnay wines produced from grapes grown on two soil textures and two vine sizes in the Niagara Peninsula, 2001. Positive values indicate a positive correlation with the corresponding factor. Negative values indicate a negative correlation. \*, \*\*, \*\*\*, and ns indicate means significantly different at  $p < 0.05$ , 0.01, 0.001, and not significant, respectively.

| Factor                         | apple | citrus | melon     | floral     | vegetal | earthy     | Apple     | Citrus    | Melon     | Floral      | Vegetal    | Earthy      | Acidity     | Astringency/<br>bitterness | Body/<br>mouthfeel | Intensity/<br>length of<br>finish |
|--------------------------------|-------|--------|-----------|------------|---------|------------|-----------|-----------|-----------|-------------|------------|-------------|-------------|----------------------------|--------------------|-----------------------------------|
| apple                          | 1.00  | -0.21  | 0.38<br>* | 0.32       | -0.13   | -0.24      | 0.36      | 0.23      | 0.22      | 0.14        | 0.00       | -0.20       | -0.03       | 0.26                       | -0.24              | -0.21                             |
| citrus                         |       | 1.00   | -0.04     | 0.05       | -0.23   | -0.06      | -0.14     | 0.25      | -0.25     | 0.04        | -0.15      | -0.13       | -0.05       | -0.18                      | 0.21               | 0.39<br>*                         |
| melon                          |       |        | 1.00      | 0.60<br>** | -0.10   | -0.22      | 0.36      | 0.18      | 0.36      | 0.48<br>**  | -0.15      | -0.28       | -0.26       | -0.34                      | -0.22              | -0.33                             |
| floral                         |       |        |           | 1.00       | -0.13   | -0.29      | 0.40<br>* | 0.44<br>* | 0.27      | 0.53<br>**  | 0.11       | -0.25       | -0.08       | -0.15                      | 0.07               | -0.08                             |
| vegetal                        |       |        |           |            | 1.00    | 0.64<br>** | 0.08      | 0.21      | -0.17     | -0.35       | 0.64<br>** | 0.68<br>*** | 0.36        | -0.03                      | -0.18              | -0.11                             |
| earthy                         |       |        |           |            |         | 1.00       | 0.06      | 0.23      | -0.08     | -0.48<br>** | 0.38<br>*  | 0.77<br>*** | 0.24        | 0.01                       | -0.25              | -0.05                             |
| Apple                          |       |        |           |            |         |            | 1.00      | 0.06      | 0.45<br>* | 0.23        | -0.10      | -0.12       | -0.19       | -0.44<br>*                 | -0.34              | 0.03                              |
| Citrus                         |       |        |           |            |         |            |           | 1.00      | -0.24     | 0.30        | 0.59<br>** | 0.35        | 0.44<br>*   | 0.18                       | -0.02              | -0.06                             |
| Melon                          |       |        |           |            |         |            |           |           | 1.00      | 0.24        | -0.44<br>* | -0.26       | -0.51<br>** | -0.53<br>**                | -0.05              | -0.45<br>*                        |
| Floral                         |       |        |           |            |         |            |           |           |           | 1.00        | 0.05       | -0.29       | 0.10        | -0.33                      | 0.25               | 0.02                              |
| Vegetal                        |       |        |           |            |         |            |           |           |           |             | 1.00       | 0.71        | 0.73<br>*** | 0.30                       | 0.05               | 0.10                              |
| Earthy                         |       |        |           |            |         |            |           |           |           |             |            | 1.00        | 0.63<br>**  | 0.19                       | 0.11               | 0.09                              |
| Acidity                        |       |        |           |            |         |            |           |           |           |             |            |             | 1.00        | 0.48<br>**                 | 0.31               | 0.36                              |
| Astringency/<br>bitterness     |       |        |           |            |         |            |           |           |           |             |            |             |             | 1.00                       | 0.00               | 0.03                              |
| Body/mouthfeel                 |       |        |           |            |         |            |           |           |           |             |            |             |             |                            | 1.00               | 0.47<br>*                         |
| Intensity/<br>length of finish |       |        |           |            |         |            |           |           |           |             |            |             |             |                            |                    | 1.00                              |
